# Supplementary material for: Wuchereria bancrofti filaria activates human dendritic cells and polarizes T helper 1 and regulatory T cells via toll-like receptor 4
Source: PubMed Central journal article supplement (PMC6505026; doi:10.1038/s42003-019-0392-8), 2019-05-07
Supplement: 42003_2019_392_MOESM3_ESM.pdf [file 42003_2019_392_MOESM3_ESM.pdf]

**a**

Gating strategy for dendritic cells

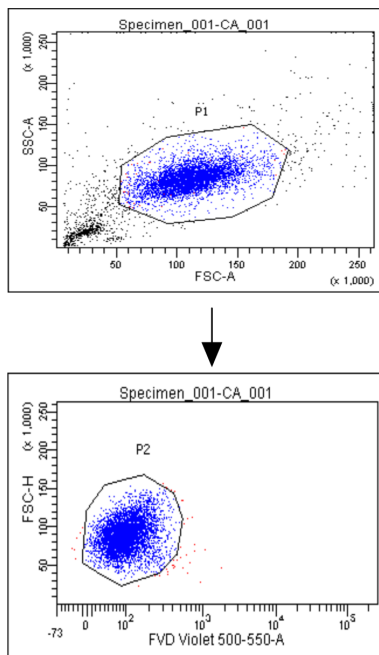**b**Gating strategy for CD4<sup>+</sup> T cells in DC-T cell co-culture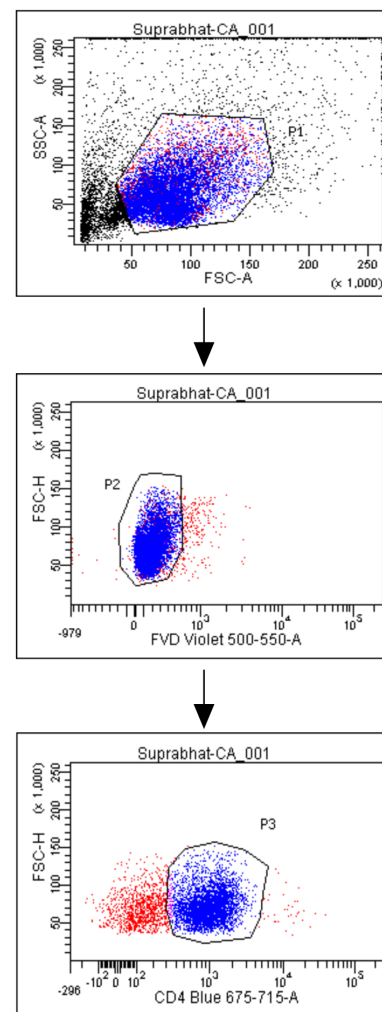

**Supplementary Figure 1.** The flow cytometer gating strategy for **(a)** dendritic cells (DCs) and **(b)** CD4<sup>+</sup> T cells.

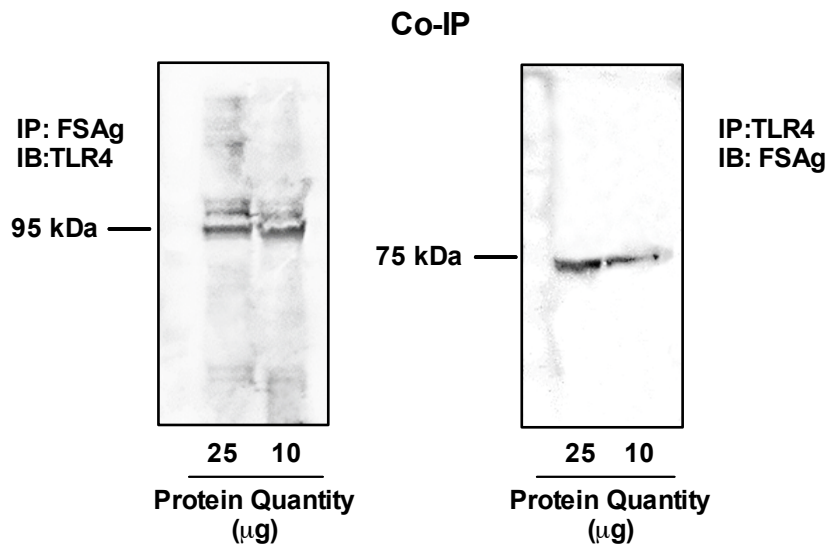

**Supplementary Figure 2.** Full, uncropped blot of co-immunoprecipitation of microfilarial sheath antigen (FSAg)–TLR4 complex followed by reciprocal immunoblotting using anti-FSAg or anti-TLR4 antibodies.
